# Supplementary material for: Validation of the Health-related Quality of Life Instrument with 8 Items for assessing health-related quality of life in patients with oropharyngeal cancer: A comparison with the EuroQol 5-Dimension 5-Level
Source: Research Square preprint supplement (doi:10.21203/rs.3.rs-6632722/v1), 2025-05-16
Supplement: Supplementary file 1 [file c798356e54a1e48a3d1159b3.docx]

*Health and Quality of Life Outcomes*

**Validation of the Health-related Quality of Life Instrument with 8 Items for assessing health-related quality of life in patients with oropharyngeal cancer: A comparison with the EuroQol 5-Dimension 5-Level**

Gyeong-U Hong, Bon Seok Koo, Min-Ju Kim, Woo-Jeong Sim, Ah-Yeon Lee, Ji-Eun A, Su-Yeon Yu, Soo Hyun Lee, Sei Young Lee

Soo Hyun Lee, Ph.D.

Department of Medical Information, School of Nursing and Health, Kongju National University, Gongju-si, Chungcheongnam-do 32588, Republic of Korea

Tel.: +82-41-850-0344

Email: [lsh5027@kongju.ac.kr](mailto:lsh5027@kongju.ac.kr)

Sei Young Lee

Department of Otolaryngology-Head and Neck Surgery, College of Medicine, Chung-Ang University, Seoul 06974, Republic of Korea

Email: [syleemd@cau.ac.kr](mailto:syleemd@cau.ac.kr)

**Additional file 1. Institutional Review Board Approval Numbers**

| Hospital | IRB Approval Number |
| --- | --- |
| Gyeongsang National University Hospital | 2023-07-030 |
| Kyung Hee University Hospital | 2023-07-036 |
| Seoul National University Bundang Hospital | B-2308-864-303 |
| Seoul National University Hospital | 2308-153-1459 |
| Asan Medical Center | 2023-1197 |
| Chung-Ang University Hospital | 2307-023-564 |
| Dankook University Hospital | 2023-08-024-001 |
| Korea University Ansan Hospital | 2023AS0340 |
| Hanyang University Guri Hospital | GURI 2023-08-023-001 |
| Chungnam National University Hospital | CNUH 2023-08-041 |
| Samsung Medical Center | 2023-08-038 |
| Soon Chun Hyang University Hospital | SCHCA 2023-08-056 |
| Ewha Womans University Medical Center | 2023-09-014 |
| The Catholic University of Korea Eunpyeong St. Mary’s Hospital | XC23QIDI0073 |
